# Supplementary material
Source: HighWire-hosted journal article supplement (https://thorax.bmj.com/content/thoraxjnl-2019-214246)
Supplement: inline-supplementary-material-1 [file inline-supplementary-material-1.pdf]

**Supplementary material**

1. Methods, intervention content and assessment and rehabilitation protocol (complete version)
2. Figure S1. Illustration of technical equipment and home equipment
3. Table S2. Per protocol analysis. Between-group differences in primary and secondary outcomes in PTR and PR groups.
4. Table S3. Within-group changes in primary and secondary outcomes in PTR and PR groups. Per protocol analysis
5. Supplement S. Admission and action diagnosis coding for respiratory-related hospital admissions.
6. Supplement S5. Hospital days and outpatient visits
7. Table S6. Study blinding of patients, personnel and researchers according to the CONSORT recommendations for non-pharmacological trials
8. Table S7. Study measures and outcomes to be collected
9. Table S8. Anticipated power on secondary outcomes
10. Table S9. Exercise content comparison group-conventional pulmonary rehabilitation
11. Table S10. Patient education topics control group-conventional pulmonary rehabilitation
12. Table S11. Warm-up protocol-pulmonary tele-rehabilitation
13. Table S12. Exercise protocol intervention group pulmonary tele-rehabilitation (Chronological order)
14. Table S13. Progression model-intervention group pulmonary tele-rehabilitation (Chronological order)
15. Table S14. Patient education protocol-intervention group pulmonary tele-rehabilitation
16. Table S15. Assessment procedures at baseline, post-rehab and at 22 weeks' follow-up

## Methods

### Study principles

The protocol for this study followed the SPIRIT 2013 (Standard Protocol Items: Recommendations for interventional Trials) and the Template for Interventions Description and Replication (TIDieR) checklist for description of the interventions<sup>1–3</sup>.

### Study design

The study is a randomized controlled, assessor- and statistician-blinded, superiority, multicenter trial with two parallel groups. The trial investigates the effect of supervised pulmonary tele-rehabilitation in groups, delivered by health professionals in the patients' own homes via a computer, in patients with severe and very severe (stage III-IV) COPD (ClinicalTrial.gov-identifier: NCT02667171). Patients from the university hospitals in the Capital Region of Denmark were randomized 1:1 to the supervised group-based pulmonary tele-rehabilitation (PTR) or to a conventional, supervised group-based pulmonary rehabilitation program (PR).

### Study setting and study population

The trial was conducted at the Respiratory and Physiotherapy Departments of eight hospitals in the capital region of Denmark. The participating hospitals were Amager, Hvidovre, Bispebjerg, Frederiksberg, Herlev, Gentofte, Frederikssund and Hillerød University Hospitals, University of Copenhagen. Recruitment of eligible patients and collection of data started March 18, 2016 and all data collection was finalized December 31, 2018 (clinicaltrial.gov registration January 12, 2016). The participating hospitals provided monthly reports on patients who accepted participation, and those who declined with reasons for their lack of participation. The recruitment was facilitated by a

steering committee with members from the departments of the participating hospitals. The investigator (HH) provided quarterly updates on the recruitment progress and participated in meetings with the clinical staff when requested.

### ***Eligibility criteria***

Potentially eligible patients were identified and recruited by a chest physician or a respiratory nurse during standard out-patient COPD check-up visits. The eligibility criteria were fully identical with routine criteria for conventional, supervised group-based pulmonary rehabilitation at the hospital. Eligibility was determined according to the inclusion and exclusion criteria listed below.

### ***Inclusion criteria***

1. Age 18 years or older
2. Clinical diagnosis of COPD defined as the ratio of forced expiratory volume at one second (FEV1) to forced vital capacity (FVC) < 0.70 and no primary diagnosis of asthma
3. FEV1 <50%, corresponding to severe or very severe airflow limitation
4. Symptoms equivalent to the Medical Research Council dyspnea scale (MRC) from 2 to 5

### ***Exclusion criteria***

1. Participation in/or recent completion of pulmonary rehabilitation within the last six months before start of intervention
2. Dementia/ cognitive impairment or symptomatic psychiatric illness
3. Impaired hearing and / or vision leading to inability to understand instructions
4. Unable to understand or speak Danish
5. Unable to read Danish

6. Severe co-morbidity leading to the recommend physical exercise for patients with COPD being contraindicated.

Eligible patients received written information of the study by the healthcare professional and verbal information about the study by the investigator or project staff. The investigator ensured that all questions regarding participation were addressed before the patient was invited to participate in the study. According to the ethical guidelines for medical research in Denmark, all patients were encouraged to consider consent for at least 24 hours before making a decision. Patients who agreed to participate were asked to sign an informed consent form to be included in the study. The patient kept the original document and a copy was archived with the Case Report Form (CRF).

### **Randomization and blinding**

After baseline assessments, patients were randomly allocated 1:1 to receiving PTR or conventional hospital-based PR. The allocation followed a computer-generated randomization list made by a biostatistician for each recruiting hospital; treatment was denoted as A and B to ensure blinding of the biostatistician. A senior manager from an independent research department was responsible for the randomization list and provided the draw to ensure concealment. The investigator or the project staff subsequently informed the patient about the allocation and when to begin. All assessors were blinded to group allocation and previous test results. Patients were not possible to blind for allocation. In the case of failure to keep the assessor blinded, a second assessor was available to conduct the blinded assessment on another day. The biostatistician had the main responsibility for the data analyses (Table S6).

### **Sample size**

The study's primary endpoint was 6-minute walk distance (6MWD). A mean change difference of 26 meters between groups was considered a minimal clinically important difference (MCID) in patients with COPD<sup>4,5</sup>. Based on a two-sample independent t-test with the given MCID of 26 meters, standard deviation of 44.6 meters based on data published by Puhan et al. 2011<sup>5</sup>, power of 80% and significance level of 0.05, 47 patients were needed in each group, 94 in total. A drop-out rate of 30% was anticipated, and 134 patients were included in the final study population to reach sufficient power for the per-protocol analysis (Table S8).

### ***Power estimations for secondary outcomes***

We performed power estimations for all secondary outcomes based on the decided inclusion of 134 (67 in each group) patients and expected standard deviation (SD) and an existing minimal clinically important difference (MCID) for each outcome (Table S8). The sample of 134 patients provided power to detect clinically relevant differences in secondary outcomes for, respectively, muscle strength and leg endurance, symptoms, anxiety and depression, and health-related quality of life (HRQOL), all corresponding with a power above 80% to reject the null hypothesis (type I error 5%). The outcomes for disease-specific quality of life (Clinical COPD Questionnaire) and physical activity (steps per day) both had a power below 80%.

## Interventions

### *Warm-up in both groups (PR and PTR)*

Warm-up had a duration of five minutes (PTR group) and ten minutes (PR group). The aim was familiarization of movements, increasing range of motion and stimulation of joints, muscles and cardiorespiratory warm-up in accordance with recommendations from the American College of Sports Medicine<sup>6</sup>. The warm-up protocol is presented in (Table S9 and S11).

### *Comparison group—Conventional pulmonary rehabilitation programme (PR) (Table S9.)*

Patients in the comparison group received a supervised, standard pulmonary rehabilitation program (PR) for patients with severe and very severe (stage III-IV) COPD, in groups of 6–12 patients, which followed the Danish Health Authority's National Clinical Guideline and the Regional Guidelines<sup>7–9</sup>. The guidelines allowed minor variations in the duration of the program (from 10 to 12 weeks) but not in the program content<sup>7–9</sup>. The rehabilitation program included individually tailored physical exercise and patient education. Exercise sessions lasted 60 minutes twice weekly (weekly exercise volume of 120 minutes) for 10 weeks (in one hospital, for 12 weeks) supervised by two skilled physiotherapists with at least two years of experience with PR. The exercises used in the PR exercise program were well-documented endurance and resistance exercises<sup>10</sup> and are presented in Table S9. The time volume allocated for endurance and resistance training modalities was equal. Endurance training always included 15 minutes of stationary cycling, performed in intervals or as continuous cycling, depending on patient preference, desaturation, hip/knee/back pain and other comorbidities. Another 5–15 minutes of endurance training was performed as functional exercises in, for example, paced walking, stairclimbing or circuit training. Intensity was set to reach dyspnea

corresponding to a Borg score of CR10, 4–7, depending on whether exercises were performed continuously or at intervals.

Resistance training involved large muscle groups with 50/50 % of exercises for upper and lower extremities, respectively<sup>10–17</sup>. Volume, intensity and content specified in the training protocol is in accordance with both national and international exercise recommendations to assure appropriate dosage of exercise and intensity<sup>7–11,18,19</sup>. The exercises were executed in two to three sets of 8 to 25 repetitions (corresponding to 40–80% of 1RM) to achieve peripheral muscle fatigue and muscle strengthening (Table S9). A pause of 1–2 minutes between each set was mandatory. Exercises were done in three strength training machines (leg press, knee extension and chest press or pulldown) supplemented with dumbbells, elastic bands, and weight cuffs. Resistance was readjusted every 2<sup>nd</sup> to 4<sup>th</sup> week and depended on training adherence, repetition count, patient feedback and motivation<sup>6,20</sup>. A familiarization phase to adapt to exercising, adjust and optimize load and avoid demotivation and musculoskeletal overload injuries spanned 2–4 sessions for each patient. The patient education session of 60–90 minutes took place once a week following the exercise session and was led by a trained respiratory nurse with at least two years' PR experience. A chest physician, a physiotherapist and a dietician separately led one of ten sessions respectively during the education period. The total number of patient education sessions was 10 (in one hospital 12 lessons). Topics covered in the education program and the didactics are presented in Table S10 and were disseminated as a combination of dialog, reflection exercises and practical exercises<sup>9,21</sup> (Table S10). Overall the topics were similar to those in the PTR group (see Table S14).

*Intervention group—Pulmonary tele-rehabilitation program (PTR) (Table S11, S12 and S13)*

Patients in the intervention group received a supervised pulmonary tele-rehabilitation program (PTR), which is an intervention that has not been systematically offered in Denmark. The PTR intervention was supervised by skilled physiotherapists and respiratory nurses with at least two years of experience with conventional PR. The physiotherapist and respiratory nurses delivered PTR via a webcam at Bispebjerg Hospital to a group of 4–8 patients who exercised at home and communicated via a videoconference software system installed on a single touch screen. The videoconference software system and single touch screen was installed and delivered by a technician, who also delivered the exercise-equipment consisting of one step-box and dumbbell-pairs of 1–10kg (Figure S1). Each session was 60 minutes, e.g. 35 minutes of exercise (weekly exercise volume 105 minutes) and 20 minutes of patient education (weekly education volume 60 minutes), three times per week for 10 weeks. Exercises was supervised by a physiotherapist and patient education by a respiratory nurse. The exercises used in the PTR exercise program were identified and selected from exercises used in previous exercise intervention studies in patients with severe or very COPD and involved larger muscle groups with 50/50 % exercises for upper and lower extremities, respectively<sup>10–17</sup>. The volume, intensity and content specified in the training protocol are in accordance with both national and international exercise recommendations to assure appropriate dosage of exercise and intensity<sup>7–11,18,19</sup>. The exercises (Table S12) were done in four sets to achieve peripheral muscle fatigue and secondary exercise-induced dyspnea/breathlessness. Each set was carried out in a predefined period of 20 to 40 seconds with a maximum number of repetitions performed until muscle failure, i.e. 8 to 25 repetitions depending on the patients' exercise capacity and motivation<sup>6,20</sup> but with the aim of 12 to 20 repetitions. The pause was predefined from 40 to 20 seconds (see Table S13). The exercise velocity was based on



recommendations applying to high-repetitive exercises (> 15 repetitions)<sup>6</sup>, i.e. moderate to high speed equaling 1–2 seconds for both the concentric and the eccentric movements. The exercise load was body weight supplemented with external weight using dumbbells (1 to 20 kg). The intensity was estimated to be equivalent to 40–80% of one repetition maximum (8–25 repetitions), and exercises were performed as high repetitive time-based muscle endurance training at least 80% of the exercise time, corresponding to a weekly volume of 90 minutes (30 minutes x 3 sessions / excluding warm-up of 5 min). In practice, the training intensity was additionally assessed by using the self-rated Borg CR-10 scale (score range 0–10), aiming at a Borg score of 4–7 (moderate to very strong shortness of breath during the exercises).

The first two weeks served as a familiarization phase to adapt to exercising, to adjust and optimize the load and to avoid demotivation and musculoskeletal overload injuries. Thus exercises for the lower extremities (Table S12: exercise # 1, 3, 5) were carried out without dumbbells at the first session. If a patient could perform three consecutive sets without resting during the active period, external load was added at the subsequent training session. The external re-load increase ranged from 2 to 4 kilo (total weight for two dumbbells) when progression adjustments were made. Exercises for the upper extremities (Table S12: exercise # 2, 4, 6) were carried out with the smallest weights (1kg / pcs.) at the first exercise session.

*Progression:* If the patient could perform three consecutive sets without rest during the active period, external load was added at the subsequent training session. The external load increase ranged from 2 to 4 kilo (total weight for two dumbbells) when progression adjustments were made. Progressions were assessed individually from session to session<sup>12–15</sup>. In addition, patients were asked to count their repetitions in each set every 6<sup>th</sup> sessions (every 2<sup>nd</sup> week), and if the number of repetitions exceeded 25, the external load was increased at the next training session.

### *Exercise log*

Each patient had an exercise log completed by the supervisor who instructed the sessions on-screen. The exercise log contained the number of completed sets, loads in kilo, customized additions and non-completed sets for each participant for all sessions.

### *Patient education*

The education topics were disseminated as a combination of dialog, reflection exercises and practical exercises<sup>9,21</sup> (Table S14). Overall, the topics were similar to those in PR but delivered as 20-minute sessions three times per week in total 30 sessions. The medical and nutrition topics were provided by a respiratory nurse in the PTR education sessions.

The dissemination focused in particular on

- Participation and dialog to facilitate sustainable knowledge related to COPD
- Creation of space for reflection and for patients to develop their own action plan for dealing with the disease
- Awareness and acceptance of patients' different ways of understanding and acquiring knowledge
- Promotion of the positive aspects and opportunities of life with COPD

### **Statistical analysis**

Descriptive data for the PTR and conventional PR are presented as mean and SD except where otherwise indicated. Differences between the intervention groups in change of primary and secondary outcomes (end of intervention–baseline and 22 weeks' follow-up from baseline–baseline) were analyzed by mixed effect models. The models included adjustment for treatment group, age, sex, BMI, FEV<sub>1</sub>, Charlson Comorbidity Index, smoking status, and a random effect for hospital allocation. To account for possible regression to the mean effect, the baseline measure for the outcome was also included as a fixed effect variable in the models. Normal distribution of the

model residuals was evaluated by Q-Q plots. All data are considered missing at random and because of this, the ignorability assumption for the likelihood estimator is used to account for missing data (number of datasets is stated in the Manuscript Table 1 and 2 and Supplement Table S2 and S3). Group differences on number of patients remaining in their programs for the full intervention period, adherence, hospitalization and death were analyzed with chi-squared test. Per-protocol analysis included patients attending  $\geq 70\%$  of the planned session. Statistical analyses were carried out using R 3.2.2 (R Foundation for Statistical Computing, Vienna, Austria). P-values of less than 0.05 were considered statistically significant.

#### *Health economic analysis*

Costs related to the interventions are calculated based on the expenses associated with exercise instruction and support, the time used by participants and relatives, transportation costs and the participants' use of healthcare services. Cost-effectiveness (cost per quality-adjusted life year) is estimated from the cost calculations combined with changes in EQ-5D-3L scores over time during the observation period. Costs related to COPD treatment and the use of healthcare services by patients and relatives are estimated from national administrative health registries.

The health economic analysis will be published in a separate publication and a potential business case conducted by an independent research company when the clinical outcomes are published.

#### **Compliance**

In addition to the intention-to-treat analysis, a per-protocol analysis was performed. The participants in both groups had to completed 70% of the COPD rehabilitation program to be included in the per-protocol analysis.

### **Data collection**

Blinded assessors performed pre- post- and follow-up tests and collected data in CRFs at five locations (Bispebjerg-, Hvidovre-, Gentofte-, Herlev- and Frederikssund University Hospitals) to cover the whole Capital Region. For practical reasons, all locations had two to three assessors available. All assessors completed a four-hour assessor course to ensure they followed the same testing protocol and that test procedures and recording of results were standardized. In addition, assessors had observed at least four live tests before being accredited as blinded assessors. All raters were familiar with the 6MWT and 30-sec-STS from clinical practice. The median years of experience after graduation as a therapist was 11.5 years (10 years [n=3]; 10–20 years [n=4]; and >20 years [n=3]). The therapists had experience in areas relating to geriatrics, cancer, heart and lung diseases, neurology, and orthopedics as well as in the intensive care unit.

All assessments followed the same procedures (Figure S15) and were conducted under the same conditions, including the same location and a time frame from 10am to 2pm, Monday–Friday. Patients were instructed not to do any vigorous activities three hours prior to assessments and to take their prescribed medication as usual. The assessment/test procedure reflects the conditions in everyday clinical practice, where several performance tests and questionnaires are conducted within a narrow time frame (Figure S15).

### **Data management**

All CRFs and questionnaires were checked for errors and missing data before being entered in a log-protected spreadsheet database. All entered data were double checked against the CRF, and range checked. The principal investigator had blinded access to the full dataset, and co-investigators and the steering committee had blinded access as needed for random auditing. All paper-based

CRFs and questionnaire versions were anonymized and locked in a filing cabinet to ensure data confidentiality. Data management complied with the rules of the Danish Data Protection Agency.

### **Adverse event reporting**

Adverse events were recorded in the CRF. The protocol distinguishes between adverse events arising from the study interventions and those not attributable to the study. Serious adverse events were reported within 24 h to the principal investigator. The steering committee, consisting of a pulmonologist, respiratory nurse and clinical physiotherapist, surveyed the study and evaluated serious adverse events.

### **Technical hardware and software used in the pulmonary tele-rehabilitation program**

#### *Hardware/software*

The screen solution used was called Homecare. The screen for patients was a 511 x 309 x 38mm single touch interface with a power on/off and one touch button. The healthcare professional (HCP) screen was 930 x 523 x 38mm. The patient and HCP screens were connected to a professional video conference system that allowed professionals and patients to see, hear and talk to single or multiple persons at one time and supported group sessions.

The conference took place via an encrypted connection that met data protection standards in Denmark. Data were transmitted via IPSEC VPN connection. Patient data were transferred via OIOXML and prepared in HL7 standards.

The technical equipment and support were rented for 67 patient set-ups in the pulmonary tele-rehabilitation program.

## Outcomes (see Table S7)

### Physical performance outcome measure

*The 6-minute walk test (6MWT)* measured endurance and walking capacity. The 6MWT is widely used for measurement of endurance walking capacity in patients with COPD<sup>10,22</sup>. The walking course was 20 meter due to walking space shortage at some locations and to ensure the same standard walking length at all five locations<sup>23</sup>. Apart from corridor length, the 6MWT test was conducted in accordance with standardized guidelines<sup>22</sup>; patients were instructed to walk as far as possible in 6 minutes, receiving recommended standardized encouragement; two tests were performed to eliminate a potential learning effect and the highest value was recorded; a 30-minute rest was mandatory between the first and second 6MWT.

*The 30-second sit-to-stand test (30sec-STT)* was used as an indirect assessment of lower limb muscle endurance strength<sup>24,25</sup>. A standardized chair with a seat height of 45–47 cm was used at the five test sites for all assessments; patients were asked to stand up fully and sit down as many times as possible in 30 seconds with their arms across the chest. The number of full stands was recorded. A score zero was recorded if a patient was unable to rise from the chair without using his or her arms. Two tests were performed to eliminate a potential learning effect; the best result was recorded. A 30-minute rest was mandatory between the first and second 30sec-STT.

*24-hour physical activity* was measured with an *activePAL*<sup>TM</sup> triaxial accelerometer (PAL Technologies Ltd., Glasgow, UK). Patients were asked to wear an *activePAL*<sup>TM</sup> on the thigh 24 hours a day for five days prior to randomization; five days during the intervention period (after 5–7 weeks); five days after completion of intervention period; and for five days 22-weeks from baseline. Due to limited staff resources and geographical transportation issues, activity level was measured

only in the first 68 patients (approximately 50% of the population) who lived within a radius of 25 kilometers of Bispebjerg University hospital. The *activePAL*<sup>TM</sup> accelerometer is attached on the front of the thigh and measures the number of steps, time spent lying/sitting (thigh in horizontal position), and time spent standing and walking (thigh in a vertical position), cadence, and the number of sit-to-stand and stand-to-sit transitions. The *activePAL*<sup>TM</sup> is a valid and reliable measure of posture and transitions in mobility-limited older adults and adults with severe and very severe COPD<sup>26–28</sup>. However, *activePAL*<sup>TM</sup> underestimates step rate at slow walking speeds compared with observed step counts, whereas step rate with the use of walking aids, such as rollator and crutches does not differ from observed step rate counts<sup>28</sup>. A walking speed between 2.4 and 5.6 km/h is preferable to obtain valid data on time spent walking<sup>26,29</sup>; consequently, walking time could potentially be categorized as standing in those with a walking speed slower than 2.4km/h<sup>26,29</sup>. Accordingly, we dichotomized position data into time spent sedentary (lying/sitting) and upright (standing/walking).

### **Patient reported outcome measures (PROMS)**

The PROMS, COPD Assessment Test (CAT), Hospital Anxiety and Depressions Scale (HADS), EuroQol 5-Dimension Questionnaire (EQ-5D), and Clinical COPD Questionnaire (CCQ) were completed in a quiet room during a scheduled mandatory rest period between the two sessions of physical performance outcome measures. The questionnaires were completed without inference from the blinded assessor.

Figure S1. Pictures of technical and exercise equipment

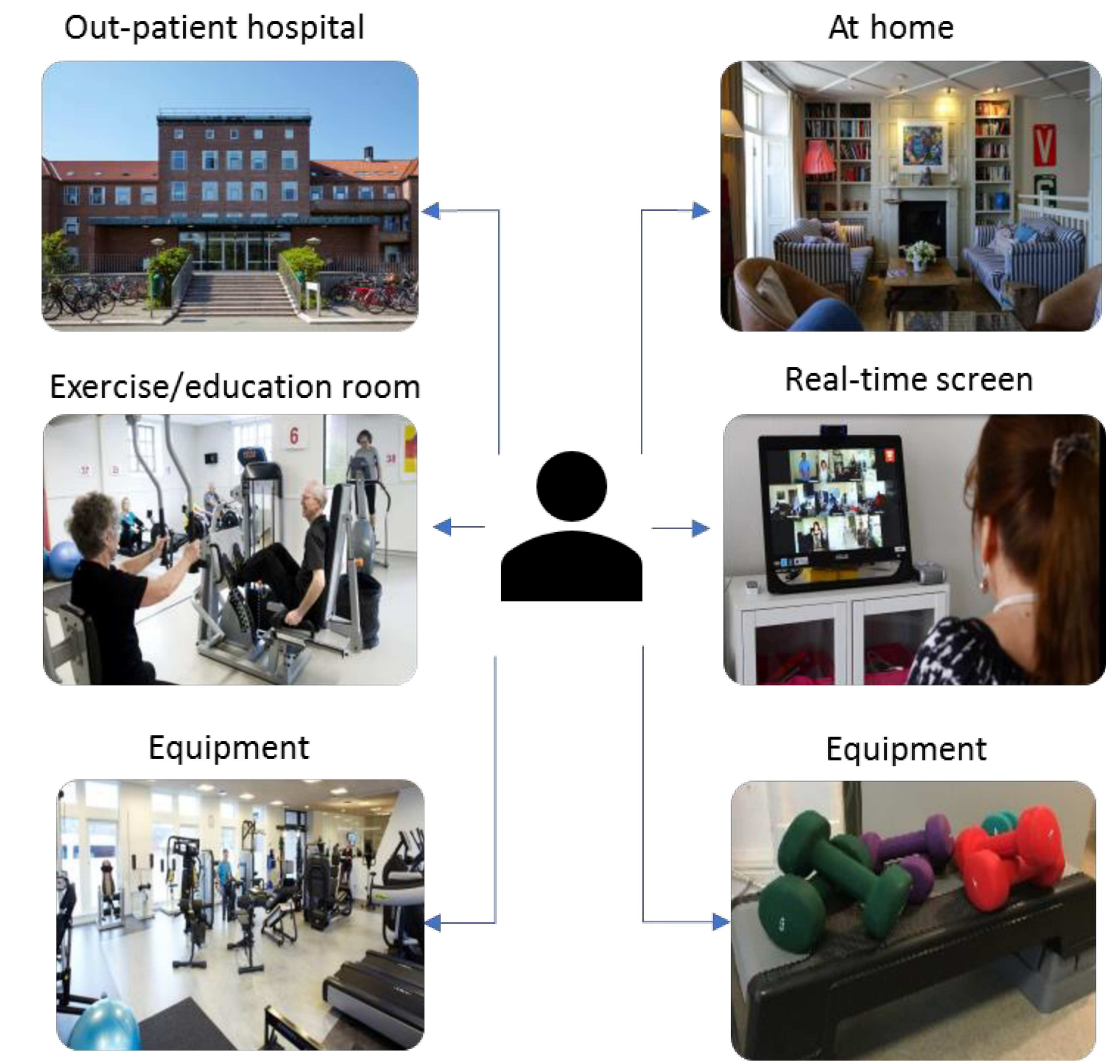



**Table S2. Between-group differences in primary and secondary outcomes in PTR and PR groups. Per protocol analysis**

|                           | Between-group changes from baseline (95% CI) |                                      |                                 |                                      |
|---------------------------|----------------------------------------------|--------------------------------------|---------------------------------|--------------------------------------|
|                           | PR- PTR (Unadjusted)                         |                                      | PR- PTR (Adjusted)              |                                      |
|                           | End rehabilitation <sup>#</sup>              | 22-weeks from baseline <sup>##</sup> | End rehabilitation <sup>#</sup> | 22-weeks from baseline <sup>##</sup> |
| <b>Primary outcome</b>    |                                              |                                      |                                 |                                      |
| 6MWD, m                   | 5.0 (-11.2; 21.2)                            | -11.3 (-36.0; 13.4)                  | 7.4 (-9.5; 23.9)                | -6.1 (-31.4; 19.1)                   |
| <b>Secondary outcomes</b> |                                              |                                      |                                 |                                      |
| 30sec-STs, reps           | 0.5 (-0.6; 1.7)                              | 0.3 (-0.9; 1.5)                      | 0.7 (-0.5; 1.9)                 | 0.4 (-0.8; 1.6)                      |
| CAT, points               | 1.2 (-0.6; 3.0)                              | -0.8 (-3.2; 1.6)                     | 1.0 (-0.8; 2.8)                 | -0.9 (-3.1; 1.3)                     |
| HADS                      |                                              |                                      |                                 |                                      |
| Anxiety, points           | 0.6 (-0.6; 1.7)                              | -0.5 (-1.7; 0.7)                     | 0.5 (-0.7; 1.7)                 | -0.6 (-1.8; 0.6)                     |
| Depression, points        | 0.4 (-0.5; 1.3)                              | -0.3 (-1.6; 0.9)                     | 0.4 (-0.5; 1.3)                 | -0.2 (-1.6; 1.1)                     |
| EQ5D-VAS, points          | 0.3 (-6.8; 7.3)                              | 1.9 (-5.4; 9.1)                      | 1.8 (-4.8; 8.4)                 | 2.2 (-5.1; 9.5)                      |
| CCQ                       |                                              |                                      |                                 |                                      |
| Function, points          | 0.0 (-0.3; 0.4)                              | 0.1 (-0.3; 0.5)                      | -0.1 (-0.4; 0.3)                | 0.1 (-0.3; 0.5)                      |
| Mental, points            | 0.1 (-0.3; 0.6)                              | -0.2 (-0.6; 0.3)                     | 0.2 (-0.3; 0.7)                 | -0.1 (-0.5; 0.3)                     |
| Symptoms, points          | 0.2 (-0.2; 0.5)                              | 0.1 (-0.4; 0.5)                      | 0.1 (-0.2; 0.5)                 | 0.1 (-0.3; 0.4)                      |
| Total, points             | 0.1 (-0.2; 0.4)                              | 0.0 (-0.3; 0.3)                      | 0.1 (-0.2; 0.4)                 | 0.0 (-0.3; 0.3)                      |
| PAL                       |                                              |                                      |                                 |                                      |
| Steps per day             | -361 (-1084; 361)                            | -559 (-1345; 227)                    | -464 (-1211; 283)               | -232 (-1083; 619)                    |
| Sedentary, minutes        | 5.9 (-26.1; 37.2)                            | 18.0 (-26.6; 62.5)                   | 5.8 (-26.1; 37.3)               | 3.4 (-44.6; 47.8)                    |
| Active, minutes           | -5.9 (-37.2; 26.1)                           | -18.0 (-62.5; 26.6)                  | -5.8 (-37.3; 26.1)              | -3.4 (-47.8; 44.6)                   |

*Definition of abbreviations:* 6MWD: 6-minute walk distance; 30sec-STs: 30-second sit-to-stand test; CAT: COPD Assessment Test; CCQ: COPD Clinical Questionnaire; HADS: Hospital Anxiety and Depression Scale; EQ5d-VAS: EuroQol 5-Dimension Questionnaire; PAL: Physical Activity Level; Data are mean difference (95% confidence interval); \* p-value within group changes <0.05; † p-value for group mean change differences <0.05.

<sup>#</sup>Complete observations (n) used for the likelihood estimate from end of rehabilitation to baseline (total): 6MWD: (88); 30sec-STs: (88); CAT: (89); HADS: (80); EQ5d-VAS: (89); CCQ: (89); PAL: (43).

<sup>##</sup>Complete observations (n) used for the likelihood estimate from 22-weeks follow-up from baseline to baseline (total): 6MWD: (79); 30sec-STs: (79); CAT: (86); HADS: (80); EQ5d-VAS: (85); CCQ: (86); PAL: (43).

**Table S3. Within-group changes in primary and secondary outcomes in PTR and PR groups.  
Per protocol analysis**

|                           | Within-group changes from baseline (95% CI) |                                        |                                   |                                        |
|---------------------------|---------------------------------------------|----------------------------------------|-----------------------------------|----------------------------------------|
|                           | PTR (n=67)                                  |                                        | PR (n=67)                         |                                        |
|                           | End rehabilitation <sup>###</sup>           | 22-weeks from baseline <sup>####</sup> | End rehabilitation <sup>###</sup> | 22-weeks from baseline <sup>####</sup> |
| <b>Primary outcome</b>    |                                             |                                        |                                   |                                        |
| 6MWD, m                   | 19.4 (8.5; 30.3)*                           | 27.9 (10.2; 45.6)*                     | 24.4 (12.4; 36.3)*                | 16.6 (-1.0; 33.8)                      |
| <b>Secondary outcomes</b> |                                             |                                        |                                   |                                        |
| 30sec-STs, reps           | 1.3 (0.5; 2.1)*                             | 1.4 (0.3; 2.4)*                        | 1.9 (1.0; 2.7)*                   | 1.6 (0.6; 2.6)*                        |
| CAT, points               | -1.5 (-2.7; -0.3)*                          | 0.1 (-1.5; 1.8)                        | -0.3 (-1.6; 1.1)                  | -0.7 (-2.4; 1.1)                       |
| HADS                      |                                             |                                        |                                   |                                        |
| Anxiety, points           | -0.8 (-1.5; -0.1)*                          | -0.1 (-1.0; 0.7)                       | -0.2 (-1.0; 0.6)                  | -0.7 (-1.5; 0.2)                       |
| Depression, points        | -0.2 (-0.9; 0.4)                            | 1.0 (-0.1; 2.2)                        | 0.2 (-0.5; 0.9)                   | 0.7 (-0.5; 2.0)                        |
| EQ5D-VAS, points          | 4.6 (-0.2; 9.4)                             | 4.0 (-1.0; 9.0)                        | 4.9 (-0.3; 10.0)                  | 5.9 (0.6; 11.1)*                       |
| CCQ                       |                                             |                                        |                                   |                                        |
| Function, points          | -0.2 (-0.4; 0.1)                            | 0.1 (-0.2; 0.3)                        | -0.1 (-0.4; 0.1)                  | 0.2 (-0.1; 0.5)                        |
| Mental, points            | -0.3 (-0.6; 0.1)                            | 0.1 (-0.3; 0.4)                        | -0.1 (-0.5; 0.2)                  | -0.1 (-0.5; 0.3)                       |
| Symptoms, points          | -0.3 (-0.6; -0.1)*                          | -0.3 (-0.6; 0.1)                       | -0.1 (-0.4; 0.2)                  | -0.2 (-0.5; 0.1)                       |
| Total, points             | -0.2 (-0.4; -0.1)*                          | 0.0 (-0.2; 0.2)                        | -0.1 (-0.3; 0.1)                  | 0.0 (-0.2; 0.2)                        |
| PAL                       |                                             |                                        |                                   |                                        |
| Steps per day             | -139 (-634; 329)                            | -188 (-712; 334)                       | -500 (-1063; -41)*                | -748 (-1325; -171)*                    |
| Sedentary, minutes        | 15.3 (-14.1; 48.1)                          | 9.1 (-22.4; 38.3)                      | 9.3 (-22.3; 44.5)                 | 27.1 (-9.1; 58.4)                      |
| Active, minutes           | -15.3 (-48.1; 14.1)                         | -9.1 (-38.3; 22.4)                     | -9.3 (-44.5; 22.3)                | -27.1 (-58.4; 9.19)                    |

*Definition of abbreviations:* 6MWD: 6-minute walk distance; 30sec-STs: 30-second sit-to-stand test; CAT: COPD Assessment Test; CCQ: COPD Clinical Questionnaire; HADS: Hospital Anxiety and Depression Scale; EQ5d-VAS: EuroQol 5-Dimension Questionnaire; PAL: Physical Activity Level.

Data are mean difference (95% confidence interval). Estimates adjusted for baseline outcome measure. Estimates calculated for baseline measure equal to the mean baseline measure for study population.

\* p-value within group changes <0.05; † p-value for group mean change differences <0.05.

<sup>###</sup> Complete observations (n) used for the likelihood estimate from end of rehabilitation to baseline (PTR/PR): 6MWD: (47/41); 30sec-STs: (47/42); CAT: (47/42); HADS: (43/37); EQ5d-VAS: (47/42); CCQ: (47/42); PAL: (24/19).

<sup>####</sup> Complete observations (n) used for the likelihood estimate from 22-weeks follow-up from baseline to baseline (PTR/PR): 6MWD: (38/41); 30sec-STs: (38/41); CAT: (45/41); HADS: (43/38); EQ5d-VAS: (44/41); CCQ: (45/41); PAL: (23/20).

#### Supplements S4. Admission and action diagnosis coding for respiratory-related hospital admissions.

Respiratory hospitalizations were defined based on admission with an action diagnosis DJ44 alone,  
or

DJ13, DJ14, DJ15, DJ16, DJ17, DJ18 or DJ96 but these must all include DJ44 as secondary diagnosis.

#### Supplements S5. hospital days and out-patient visits.

|                                                                        | PTR              | PR              |
|------------------------------------------------------------------------|------------------|-----------------|
| Hospital days per admission per patient<br>All-cause, median [IQR]     | 2.3 [1.3; 3.4]   | 2.2 [1.1; 4.7]  |
| Hospital days total admission per patient<br>All-cause, median [IQR]   | 11.8 [3.4; 27.8] | 5.2 [3.2; 13.8] |
| Hospital days per admission per patient<br>Respiratory, median [IQR]   | 2.4 [1.6; 3.7]   | 2.5 [1.2; 5.2]  |
| Hospital days total admission per patient<br>Respiratory, median [IQR] | 7.5 [3.1; 14.4]  | 5.2 [2.6; 10.0] |
| Out-patient visits<br>10-weeks from baseline, number                   | 113              | 744             |
| Out-patient visits<br>22-weeks from baseline, number                   | 270              | 899             |

**Table S6. Study blinding of patients, personnel and researchers according to the CONSORT recommendations for non-pharmacological trials**

|                                            | Study hypotheses and objectives | Blinded to:            |                   |                          |
|--------------------------------------------|---------------------------------|------------------------|-------------------|--------------------------|
|                                            |                                 | Intervention details   | Random assignment | Outcome measures         |
| Study participants                         | Yes                             | Partially <sup>1</sup> | Yes               | Partially <sup>3</sup>   |
| Hospital staff                             | Yes                             | Yes                    | Yes               | Partially <sup>2,3</sup> |
| Blinded assessors                          | Yes                             | Yes                    | Yes               | No                       |
| Intervention staff (PT, RN, MD, Dietician) | No                              | No                     | Yes               | Yes                      |
| Researchers, steering committee            | No                              | No                     | Yes               | Partially <sup>4</sup>   |
| Statistician                               | No                              | Yes                    | Yes               | Partially <sup>5</sup>   |
| Allocation senior manager                  | Yes                             | Yes                    | No                | Yes                      |

<sup>1</sup> Patients were aware of the existence of two interventions and the overall content as a mandatory requirement from the Ethics Committee.

<sup>2</sup> Health professionals taking care of the patients were blinded, except where a member of the research team was the physician of a patient involved and the patient revealed the intervention content. According to the physician (n=1), this situation happened in 0 (0%) patients.

<sup>3</sup> Outcome information was given to patients if they requested it and was sent to their physicians if patients requested. No information of the intervention or study objectives was included.

<sup>4</sup> Outcome information was available for mandatory audit. Available but blinded for allocation.

<sup>5</sup> Outcome information was not available until the analysis phase. Available but blinded for allocation.

**Table S7. Study measures and outcomes to be collected**

| Variable                                   | Baseline | 10/12 weeks (post) | 22-weeks from baseline |
|--------------------------------------------|----------|--------------------|------------------------|
| <b>Primary outcomes</b>                    |          |                    |                        |
| 6-min walk distance (6MWD)                 | X        | X                  | X                      |
| <b>Secondary outcomes</b>                  |          |                    |                        |
| 30sec sit-to-stand test (30STS)            | X        | X                  | X                      |
| Clinical COPD Questionnaire (CCQ)          | X        | X                  | X                      |
| COPD Assessment Test (CAT)                 | X        | X                  | X                      |
| Hospital Anxiety Depression Scale          | X        | X                  | X                      |
| EuroQol 5D (3-L)                           | X        | X                  | X                      |
| 24h-mobility (ActivePAL3tm; 5 days)        | X        | X                  | X                      |
| <b>Other variables and outcomes</b>        |          | X                  |                        |
| Attendance of rehabilitation               | X        | X                  | X                      |
| Number of COPD-related hospital admissions | X        | X                  | X                      |
| Number of COPD hospital days               | X        | X                  | X                      |
| COPD-related outpatient visits             | X        | X                  | X                      |
| Number of COPD exacerbations               | X        | X                  | X                      |
| Mortality                                  |          | X                  | X                      |
| <b>Descriptive variables</b>               |          |                    |                        |
| Lung function                              | X        |                    |                        |
| FVC                                        | X        |                    |                        |
| FEV1                                       | X        |                    |                        |
| FEV1/FVC%                                  | X        |                    |                        |
| FEV1% expected                             | X        |                    |                        |
| Charlson Comorbidity Index                 | X        |                    |                        |
| <b>Anthropometric measures</b>             |          |                    |                        |
| Gender                                     | X        |                    |                        |
| Age                                        | X        |                    |                        |
| Weight                                     | X        | X                  | X                      |
| Height                                     | X        | X                  | X                      |
| Body Mass Index (BMI)                      | X        | X                  | X                      |
| <b>Self-reported measures</b>              |          |                    |                        |
| Smoking status                             | X        | X                  | X                      |
| Pharmacologic treatment                    | X        | X                  | X                      |

| <b>Table S8. Anticipated power on secondary outcomes</b> |                                                                          |                                                                                                                                                |                                                                                        |                                                        |
|----------------------------------------------------------|--------------------------------------------------------------------------|------------------------------------------------------------------------------------------------------------------------------------------------|----------------------------------------------------------------------------------------|--------------------------------------------------------|
| <b>Variables</b>                                         | <b>Instrument</b>                                                        | <b>Subscales</b>                                                                                                                               | <b>Cronbach's alpha</b>                                                                | <b>Hypothesized Difference/ SD (anticipated power)</b> |
| Muscle strength and endurance legs                       | 30 seconds sit-to-stand test                                             | Total number of repetitions                                                                                                                    | NR (not reported)                                                                      | 2.0/2.5 (0.99)                                         |
| Symptoms                                                 | COPD Assessment Test (CAT)                                               | Eight symptom questions (0-5 points)<br>Total score 0-40 points                                                                                | 0.88                                                                                   | 3.0/5.5 (0.88)                                         |
| Disease-specific quality of life                         | Clinical COPD Questionnaire (CCQ)                                        | Ten items, three domain scores (symptoms, functional and mental) and overall score.<br>Items score ranges 0–6                                  | Overall score 0.91<br>Symptom score 0.78<br>Functional score 0.89<br>Mental score 0.80 | Overall score 0.4/1.1 (0.55)                           |
| Anxiety and depression                                   | Hospital Anxiety and Depressions Scale (HADS)                            | HADS-A scale (0-21)<br>HADS-D scale (0-21)                                                                                                     | HADS-A 0.83<br>HADS-D 0.82                                                             | HADS-A 1.5/2.5 (0.93)<br>HADS-D 1.5/2.5 (0.93)         |
| Health-Related Quality of Life                           | EuroQol 5-Dimension Questionnaire (EQ-5D)                                | EQ5D-questionnaire (mobility, self-care, usual activities, pain/discomfort, and anxiety/depression)<br>Norm based utility score (-0.624-1.000) | Not relevant—only one question in each dimension                                       | EQ5D-VAS 8/16 (0.82)                                   |
| Physical activity                                        | <i>active</i> PAL™ activity monitor (PAL Technologies Ltd., Glasgow, UK) | EQ5D-VAS (0-100 millimeters)<br>Steps per day<br>Minutes lying/sitting<br>Minutes standing/walking<br>Number of body transitions per day       | NR (not reported)                                                                      | Steps per day 1100/2262 (0.50)                         |

**Table S9. Exercise content comparison group—conventional pulmonary rehabilitation**

| Exercise type                                                                                                                                                                                                                                                                                                                                                                                                                                                                                                                         | Exercises                                                                                                                                                                                                                                                              | Intensity                                                                                                                                | Progression                                                                                                      |
|---------------------------------------------------------------------------------------------------------------------------------------------------------------------------------------------------------------------------------------------------------------------------------------------------------------------------------------------------------------------------------------------------------------------------------------------------------------------------------------------------------------------------------------|------------------------------------------------------------------------------------------------------------------------------------------------------------------------------------------------------------------------------------------------------------------------|------------------------------------------------------------------------------------------------------------------------------------------|------------------------------------------------------------------------------------------------------------------|
| Warm-up<br>(duration 5-10min)                                                                                                                                                                                                                                                                                                                                                                                                                                                                                                         | Sitting or standing:<br>-heel uprisings<br>(uni- or bilateral),<br>- knee extension<br>- rear deltoid row<br>- chest press movement<br>- vertical shoulder press<br>(uni- or bilateral).<br><br>Standing:<br>-walking various<br>- leg curl<br>- leg swing<br>- squats | Non-specific intensity<br><br>Purpose:<br>-increase body temperature<br>- cardiorespiratory warm-up<br>-muscle and tendon tissue warm-up | none                                                                                                             |
| Endurance training<br>(duration 20-30min)                                                                                                                                                                                                                                                                                                                                                                                                                                                                                             | -Walking or<br>-Cycle or<br>- Treadmill or<br>- Circuit training or<br>- Activity games                                                                                                                                                                                | Borg CR-10 dyspnea 4-7<br><br>Exercises performed in intervals or continuously                                                           | Every 2 <sup>nd</sup> to 4 <sup>th</sup> week load adjustment individualized                                     |
| Resistance training<br>Duration 20-30min)                                                                                                                                                                                                                                                                                                                                                                                                                                                                                             | Machine:<br>-leg press<br>-knee extension<br>Pull down and/or<br>chestpress (vertical)<br><br>Other equipment for strength circuit training<br>elastic band<br>dumbbells<br>weight cuff                                                                                | 40-80% of 1RM<br>corresponding to 8-25 repetitions<br>2-3 sets                                                                           | Every 2 <sup>nd</sup> to 4 <sup>th</sup> week load adjustment individualized (repetition counting by supervisor) |
| Cool-down<br>(duration 5-10min)                                                                                                                                                                                                                                                                                                                                                                                                                                                                                                       | Breathing exercises<br>Pursed lip breathing<br>Relaxation exercises<br>Yoga exercises                                                                                                                                                                                  | Non-specific intensity                                                                                                                   | Non-specific                                                                                                     |
| Health professional responsible: Physiotherapist<br>Monitoring of intensity may vary, but it is expected that hospitals use either objective (pulse or Watt monitoring) or subjective (CR Borg scale for dyspnea) measurements for intensity monitoring.<br>Resistance training will be evaluated for progression by counting the maximum repetitions and estimating a new optional weight/resistance within 8-25 repetitions.<br>Workout logs from every training session are recommended to be registered by the authorization law. |                                                                                                                                                                                                                                                                        |                                                                                                                                          |                                                                                                                  |

| Table S10. Patient education topics control group—conventional pulmonary rehabilitation                                                                                                                                                                                                                                                                                                                 |                                                                                                                                                                                                                                                                                                               |
|---------------------------------------------------------------------------------------------------------------------------------------------------------------------------------------------------------------------------------------------------------------------------------------------------------------------------------------------------------------------------------------------------------|---------------------------------------------------------------------------------------------------------------------------------------------------------------------------------------------------------------------------------------------------------------------------------------------------------------|
| Topics/themes                                                                                                                                                                                                                                                                                                                                                                                           | Communication/ learning form                                                                                                                                                                                                                                                                                  |
| <ul style="list-style-type: none"><li>• COPD and the treatment</li><li>• The importance of smoking cessation</li><li>• The importance of daily activity and exercise</li><li>• The importance of nutrition</li><li>• Medication and use of devices and inhalation techniques</li><li>• Early signs of exacerbation and action plan</li><li>• Use of nebulizer apparatus and oxygen apparatus.</li></ul> | <p>Topics are promoted as a combination of</p> <ul style="list-style-type: none"><li>• Information</li><li>• Dialog</li><li>• Reflection exercises</li><li>• Practical exercises</li><li>• Focusing on increasing the individual's self-competence</li><li>• Networking and exchange of experience.</li></ul> |
| <p>Individual smoking cessation and dietary advice will be offered to the individual COPD patient if assessed relevant.</p>                                                                                                                                                                                                                                                                             |                                                                                                                                                                                                                                                                                                               |
| Health professional responsible: Respiratory nurse                                                                                                                                                                                                                                                                                                                                                      |                                                                                                                                                                                                                                                                                                               |



**Table S11. Warm-up protocol—pulmonary tele-rehabilitation**

| Time                       | Exercises                                                                                                                                                                                                                                                                                        | Intensity                                                                                                                                         | Progression |
|----------------------------|--------------------------------------------------------------------------------------------------------------------------------------------------------------------------------------------------------------------------------------------------------------------------------------------------|---------------------------------------------------------------------------------------------------------------------------------------------------|-------------|
| Warm-up<br>(duration 5min) | Sitting or standing:<br>-heel uprisings<br>(uni- or bilateral),<br>- knee extension<br>- rear deltoid row<br>- chest press movement<br>- vertical shoulder press<br>(uni- or bilateral).<br><br>Standing:<br>-Walking on site<br>- side to side walking<br>- leg curl<br>- leg swing<br>- squats | Non-specific intensity<br><br>Purpose:<br>-increase body<br>temperature<br>- cardiorespiratory<br>warm-up<br>-muscle and tendon<br>tissue warm-up | none        |

| Table S12. Exercise protocol intervention group pulmonary tele-rehabilitation (Chronological order) |                              |                   |                         |                                              |                                                         |                                   |
|-----------------------------------------------------------------------------------------------------|------------------------------|-------------------|-------------------------|----------------------------------------------|---------------------------------------------------------|-----------------------------------|
| Exercise #                                                                                          | Exercise name                | Extremities       | Uni/bilateral execution | Body position                                | Time/volume                                             | Exercise load                     |
| 1                                                                                                   | Sit-to-stand                 | Lower extremities | Bilateral               | Sitting and standing                         | Active: 80-160sec.<br>Rest:160-80sec.<br>Total: 240sec. | Bodyweight and dumbbells          |
| 2                                                                                                   | Biceps curl - shoulder press | Upper extremities | Bilateral               | Standing                                     | Active: 80-160sec.<br>Rest:160-80sec.<br>Total: 240sec. | Dumbbells                         |
| 3                                                                                                   | Step-up                      | Lower extremities | Bilateral               | Standing                                     | Active: 80-160sec.<br>Rest:160-80sec.<br>Total: 240sec. | Bodyweight, dumbbells and stepbox |
| 4                                                                                                   | Bent Over Rowing             | Upper extremities | Unilateral              | Standing<br>Upper body bent slightly forward | Active: 80-160sec.<br>Rest:160-80sec.<br>Total: 240sec. | Dumbbells                         |
| 5                                                                                                   | Static-dynamic Squat         | Lower extremities | Bilateral               | Standing                                     | Active: 80-160sec.<br>Rest:160-80sec.<br>Total: 240sec. | Bodyweight and dumbbells          |
| 6                                                                                                   | Front Raise Dumbbells        | Upper extremities | Bilateral               | Standing                                     | Active: 80-160sec.<br>Rest:160-80sec.<br>Total: 240sec. | Dumbbells                         |

**Table S13. Progression model—intervention group pulmonary tele-rehabilitation (Chronological order)**

| Phase           | Week number | Working volume<br>in seconds | Rest volume<br>in seconds | Number of sets<br>for each exercise |
|-----------------|-------------|------------------------------|---------------------------|-------------------------------------|
| Familiarization | 1-2         | 20                           | 40                        | 4                                   |
| Progression 1   | 3-6         | 30                           | 30                        | 4                                   |
| Progression 2   | 7-10        | 40                           | 20                        | 4                                   |

**Table S14. Patient education protocol—intervention group pulmonary tele-rehabilitation**

| Topic/themes                                                                                              | Communication/ learning form                         | Week | Duration | Number of<br>sessions |
|-----------------------------------------------------------------------------------------------------------|------------------------------------------------------|------|----------|-----------------------|
| Welcome and individual presentation                                                                       | Information, dialog                                  | 1    | 20min    | 3                     |
| COPD and the treatment                                                                                    | Information, dialog                                  | 2    | 20min    | 3                     |
| Early signs of exacerbation and action plan                                                               | Information, dialog, reflection                      | 3    | 20min    | 3                     |
| Medication and use of devices and inhalation techniques. Use of nebulizer apparatus and oxygen apparatus. | Information, dialog, reflection, practical exercises | 4    | 20min    | 3                     |
| Physical activity and exercise                                                                            | Information, dialog, reflection                      | 5    | 20min    | 3                     |
| Food, importance of food in COPD                                                                          | Information, dialog, reflection, practical exercises | 6    | 20min    | 3                     |
| Smoking, cessation, substitution                                                                          | Information, dialog, reflection                      | 7    | 20min    | 3                     |
| Anxiety management, relaxation                                                                            | Information, dialog, reflection, practical exercises | 8    | 20min    | 3                     |
| Repetition                                                                                                |                                                      | 9    | 20min    | 3                     |
| Group needs                                                                                               |                                                      | 10   | 20min    | 3                     |

**Table S15 Assessment procedures at baseline, post-rehab and at 22-weeks' follow up****Assessment and progression procedure**

1. Subject history/introduction, while seated: resting blood pressure, resting heart rate, resting SpO<sub>2</sub>, resting dyspnea. Standing: anthropometric measures (weight and height), (until 30 minutes)
2. Instruction and performing 6MWT, end-heart rate, end-SpO<sub>2</sub>, end-dyspnea (10 minutes)
3. Seated rest (5 minutes)
4. Instruction and performing 30sec-STS (5 minutes)
5. Four questionnaires: completion order CAT, CCQ, HADS, EQ5D-3L, quiet room no interference (30 minutes)
6. Seated: resting blood pressure, resting heart rate, resting SpO<sub>2</sub>, resting dyspnea (5 minutes)
7. Instruction and performing 6MWT, end-heart rate, end-SpO<sub>2</sub>, end-dyspnea (10 minutes)
8. Seated rest for (5 minutes)
9. Instruction and performing 30sec-STS (5 minutes)
10. Assessment session completed. Total time 145 minutes.

**Abbreviations:** SpO<sub>2</sub>, arterial oxygen saturation as measured by pulse oximetry (%); dyspnea, perceived dyspnea (Borg cr-10); 6MWT, six-minute walk test; 30sec-STS, 30 seconds sit-to-stand test (repetitions); end-, immediately measure after test completion; CAT, COPD Assessment Test; CCQ, Clinical COPD Questionnaire; HADS-A and P, Hospital Anxiety and Depressions Scale (HADS); EQ-5D-3L, EuroQol 5-Dimension 3-likert utility score and VAS score.

## References

1. Hoffmann TC, Glasziou PP, Boutron I, et al. Better reporting of interventions: template for intervention description and replication (TIDieR) checklist and guide. *BMJ*. 2014;348:g1687.
2. Chan A-W, Tetzlaff JM, Altman DG, et al. SPIRIT 2013 Statement: Defining Standard Protocol Items for Clinical Trials. *Ann Intern Med*. 2013;158(3):200.
3. Hansen H, Bieler T, Beyer N, Godtfredsen N, Kallemose T, Frølich A. COPD online-rehabilitation versus conventional COPD rehabilitation – rationale and design for a multicenter randomized controlled trial study protocol (CRe trial). *BMC Pulm Med*. 2017;17(1):140.
4. Holland AE, Hill CJ, Rasekaba T, Lee A, Naughton MT, McDonald CF. Updating the Minimal Important Difference for Six-Minute Walk Distance in Patients With Chronic Obstructive Pulmonary Disease. *Arch Phys Med Rehabil*. 2010;91(2):221-225.
5. Puhan MA, Chandra D, Mosenifar Z, et al. The minimal important difference of exercise tests in severe COPD. *Eur Respir J*. 2011;37(4):784-790.
6. Linda S Pescatello; Ross Arena; Deborah Riebe; Paul D Thompson; American College of Sports Medicine. *ACSM's Guidelines for Exercise Testing and Prescription*. 9th ed. (Lippincott Williams & Wilkins.; ed.). Lippincott Williams & Wilkins.; 2014.
7. National Board of Health. *National Klinisk Retningslinje for Rehabilitering Af Patienter Med KOL*. Copenhagen; 2014.  
<https://www.sst.dk/da/nyheder/2014/~media/C0B92E9C3BEA4B28A3294D70288EC535.aspx>. Accessed February 12, 2017.
8. Mølsted S, Dall CH, Hansen H, Beyer N. *Anbefalinger Til Superviseret Fysisk Traening Af Mennesker Med Type 2-Diabetes, KOL Og Hjerte-Kar-Sygdom*. Hillerød; 2012.  
[https://www.regionh.dk/til-fagfolk/Sundhed/Tvaersektorielt-samarbejde/kronisk-sygdom/PublishingImages/Sider/Rehabilitering/2206717238\\_RapportRHLauraJenniferMunk\\_0\\_low.pdf](https://www.regionh.dk/til-fagfolk/Sundhed/Tvaersektorielt-samarbejde/kronisk-sygdom/PublishingImages/Sider/Rehabilitering/2206717238_RapportRHLauraJenniferMunk_0_low.pdf). Accessed February 12, 2017.
9. Capital Region D. *Forløbsprogram for KOL Hospitaler, Almen Praksis Og Kommunerne i Region Hovedstaden*.; 2015. [https://www.regionh.dk/Sundhedsaftale/bilag-og-download/Documents/RH\\_Program\\_KOL\\_rev\\_2015.pdf](https://www.regionh.dk/Sundhedsaftale/bilag-og-download/Documents/RH_Program_KOL_rev_2015.pdf). Accessed February 12, 2017.
10. Spruit MA, Singh SJ, Garvey C, et al. An official American thoracic society/European respiratory society statement: Key concepts and advances in pulmonary rehabilitation. *Am J Respir Crit Care Med*. 2013;188(8).
11. Uk JB, Woodcock A, Knight A, et al. BTS Guideline on Pulmonary Rehabilitation in Adults. *An Int J Respir Med*. 2013;68(2):ii1-31.
12. McFarland C, Willson D, Sloan J, Coultas D. A randomized trial comparing 2 types of in-home rehabilitation for chronic obstructive pulmonary disease: a pilot study. *J Geriatr Phys*

*Ther.* 2012;35(3):132-139.

13. Nyberg A, Lindström B, Wadell K. Assessing the effect of high-repetitive single limb exercises (HRSLE) on exercise capacity and quality of life in patients with chronic obstructive pulmonary disease (COPD): study protocol for randomized controlled trial. *Trials*. 2012;13(1):114.
14. Janaudis-Ferreira T, Hill K, Goldstein RS, et al. Resistance Arm Training in Patients With COPD: A Randomized Controlled Trial. *Chest*. 2011;139(1):151-158.
15. Costi S, Crisafulli E, Degli Antoni F, Beneventi C, Fabbri LM, Clini EM. Effects of Unsupported Upper Extremity Exercise Training in Patients With COPD: A Randomized Clinical Trial. *Chest*. 2009;136(2):387-395.
16. Gosker HR, Lencer NHMK, Franssen FME, van der Vusse GJ, Wouters EFM, Schols AMWJ. Striking similarities in systemic factors contributing to decreased exercise capacity in patients with severe chronic heart failure or COPD. *Chest*. 2003;123(5):1416-1424. <http://www.ncbi.nlm.nih.gov/pubmed/12740256>.
17. Man WDC, Soliman MGG, Gearing J, et al. Symptoms and quadriceps fatigability after walking and cycling in chronic obstructive pulmonary disease. *Am J Respir Crit Care Med*. 2003;168(5):562-567.
18. Pedersen BK, Saltin B. Exercise as medicine - evidence for prescribing exercise as therapy in 26 different chronic diseases. *Scand J Med Sci Sports*. 2015;25 Suppl 3:1-72.
19. Troosters T, Casaburi R, Gosselink R, Decramer M. Pulmonary rehabilitation in chronic obstructive pulmonary disease. *Am J Respir Crit Care Med*. 2005;172(1):19-38.
20. Campos GER, Luecke TJ, Wendeln HK, et al. Muscular adaptations in response to three different resistance-training regimens: Specificity of repetition maximum training zones. *Eur J Appl Physiol*. 2002;88(1-2):50-60.
21. Rice KL, Dewan N, Bloomfield HE, et al. Disease management program for chronic obstructive pulmonary disease a randomized controlled trial. *Am J Respir Crit Care Med*. 2010;182(7):890-896.
22. Holland AE, Spruit M a., Troosters T, et al. An official European respiratory society/American thoracic society technical standard: Field walking tests in chronic respiratory disease. *Eur Respir J*. 2014;44(6):1428-1446.
23. Sciurba F, Criner GJ, Lee SM, et al. Six-Minute Walk Distance in Chronic Obstructive Pulmonary Disease. *Am J Respir Crit Care Med*. 2003;167(11):1522-1527.
24. Jones CJ, Rikli RE, Beam WC. A 30-s chair-stand test as a measure of lower body strength in community-residing older adults. *Res Q Exerc Sport*. 1999;70(2):113-119.
25. Zanini A, Aiello M, Cherubino F, et al. The one repetition maximum test and the sit-to-stand test in the assessment of a specific pulmonary rehabilitation program on peripheral muscle strength in COPD patients. *Int J Chron Obstruct Pulmon Dis*. 2015;10:2423-2430.
26. Grant PM, Ryan CG, Tigbe WW, Granat MH. The validation of a novel activity monitor in the measurement of posture and motion during everyday activities. *Br J Sports Med*. 2006;40(12):992-997.

27. Taraldsen K, Askim T, Sletvold O, et al. Evaluation of a body-worn sensor system to measure physical activity in older people with impaired function. *Phys Ther.* 2011;91(2):277-285.
28. Cindy Ng LW, Jenkins S, Hill K. Accuracy and responsiveness of the stepwatch activity monitor and ActivPAL in patients with COPD when walking with and without a rollator. *Disabil Rehabil.* 2012;34(15):1317-1322.
29. Ryan CG, Grant PM, Tigbe WW, Granat MH, Ryan CG. The validity and reliability of a novel activity monitor as a measure of walking. *Br J Sport Med.* 2006;40(table 1):779-784.
